# Supplementary material
Source: PubMed Central journal article supplement (PMC7499063)
Supplement: mmc1.pdf [file mmc1.pdf]

**Biophysical Journal, Volume 119**

**Supplemental Information**

**Exploring the Free-Energy Landscape and Thermodynamics of Protein-Protein Association**

**Celine Tse, Lauren Wickstrom, Mamuka Kvaratskhelia, Emilio Gallicchio, Ronald Levy, and Nanjie Deng**

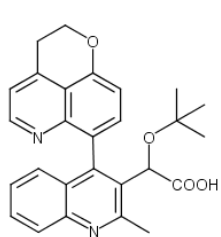

**BI-224436**  
 $EC_{50} = 15 \text{ nM}$

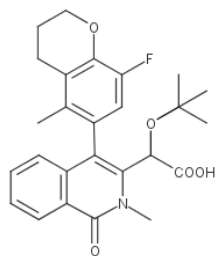

**GSK1264**  
 $IC_{50} = 38 \text{ nM}$

Figure S1. Structures of ALLINIs BI-224436 and GSK1264.

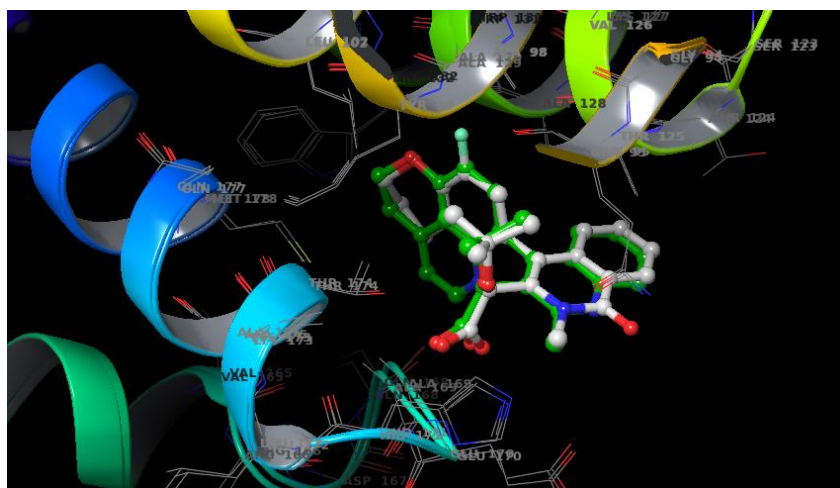

Figure S2. Overlay of GSK1264 and BI-224436 in the HIV-1 IN dimer, obtained by superimposing the protein residues in the PDB 4ojr (containing GSK1264) and the protein residues in the PDB 6nuj (containing BI224436). The carbon atoms in GSK1264 are colored white, while the carbon atoms in BI224436 are green.
